# Supplementary material for: Seasonal Variations in the Achievement of Guideline Targets for HbA1c, Blood Pressure, and Cholesterol Among Patients With Type 2 Diabetes: A Nationwide Population-Based Study (ABC Study: JDDM49)
Source: Oxford University Press journal article supplement (doi:10.2337/dc18-1953), 2019-02-10

SUPPLEMENTARY DATA

**Supplementary Figure S1. Study population**

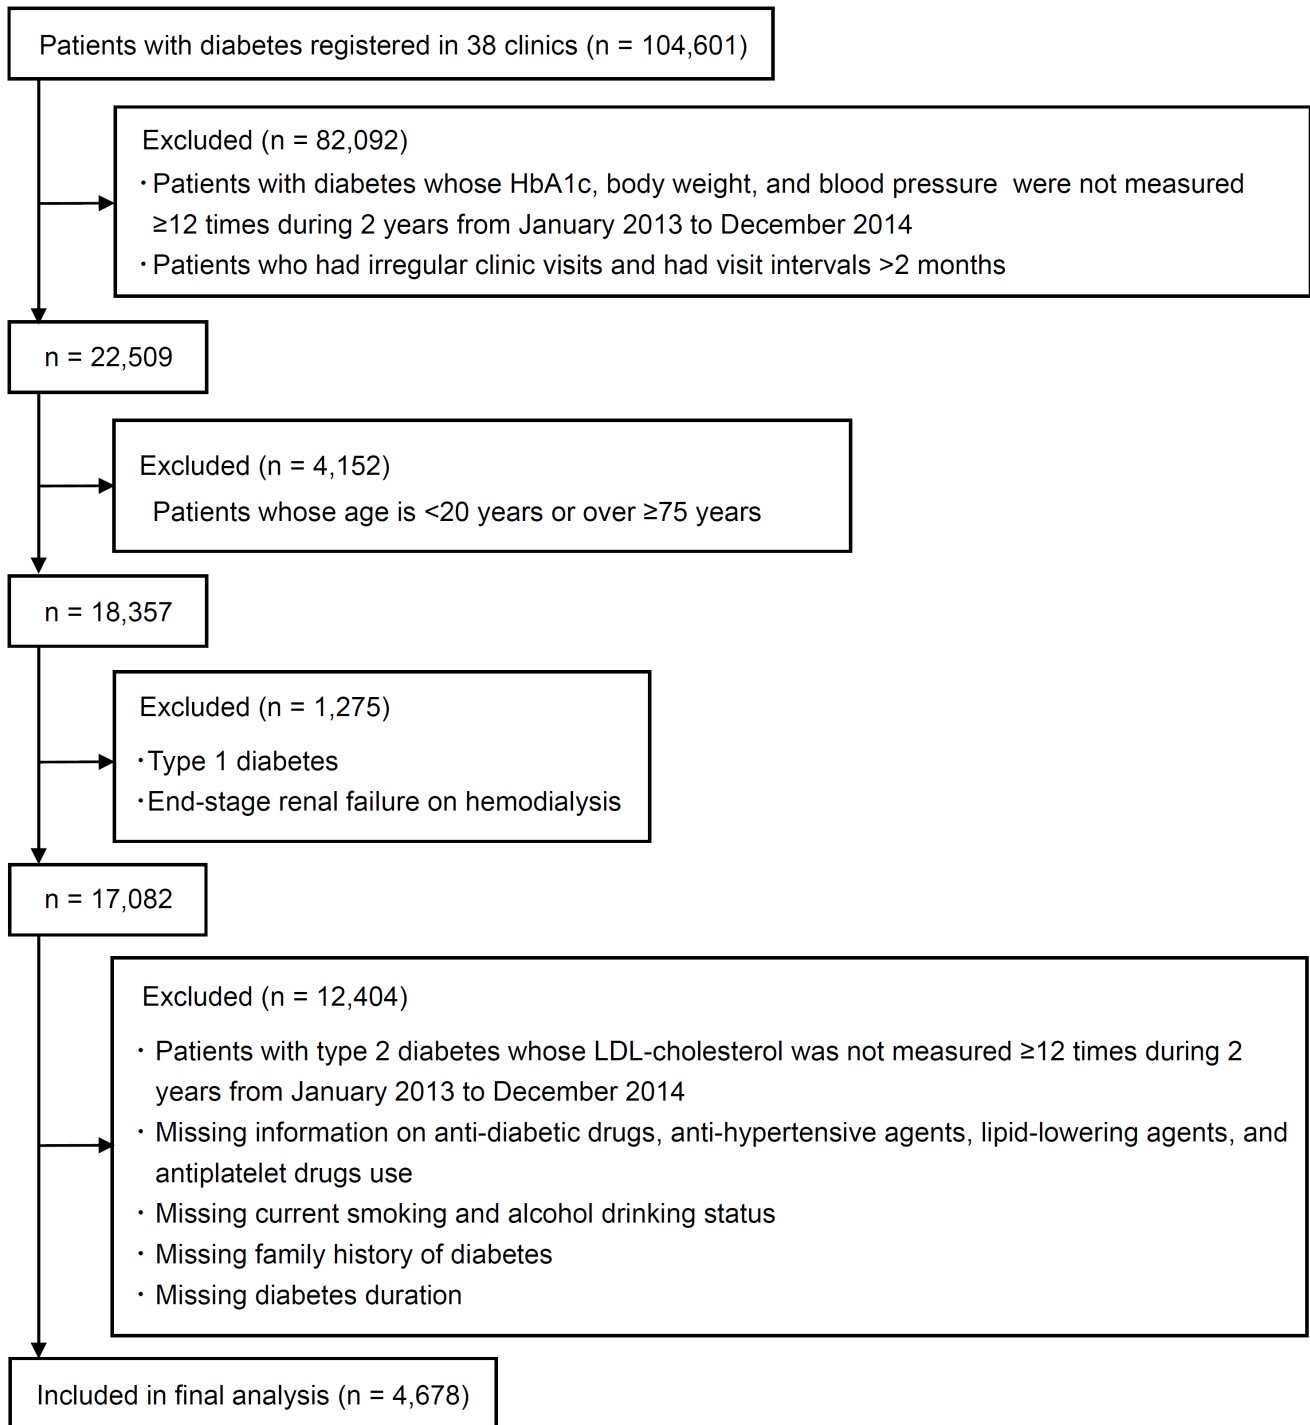

SUPPLEMENTARY DATA

**Supplementary Figure S2. (A)** Proportion of patients with the indicated BP target groups (SBP <130 mmHg and DBP <80 mmHg or SBP ≥130 mmHg and DBP ≥80 mmHg) within each HbA1c target group (HbA1c <7% or ≥7%) in summer and winter. **(B)** Proportion of patients with the indicated LDL-C target groups (LDL-C <100 mg/dL or ≥100 mg/dL) within each HbA1c target group in summer and winter. **(C)** Proportion of patients with the indicated BP target groups within each LDL-C target group in summer and winter. SBP, systolic blood pressure; DBP, diastolic blood pressure; LDL-C, low-density lipoprotein cholesterol

**A. HbA1c and Blood pressure**

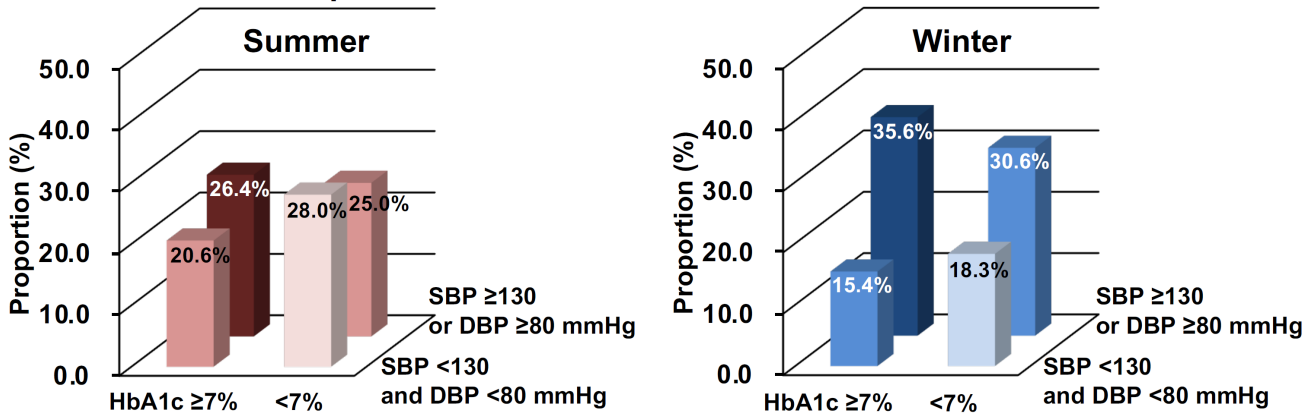

**B. HbA1c and LDL-cholesterol**

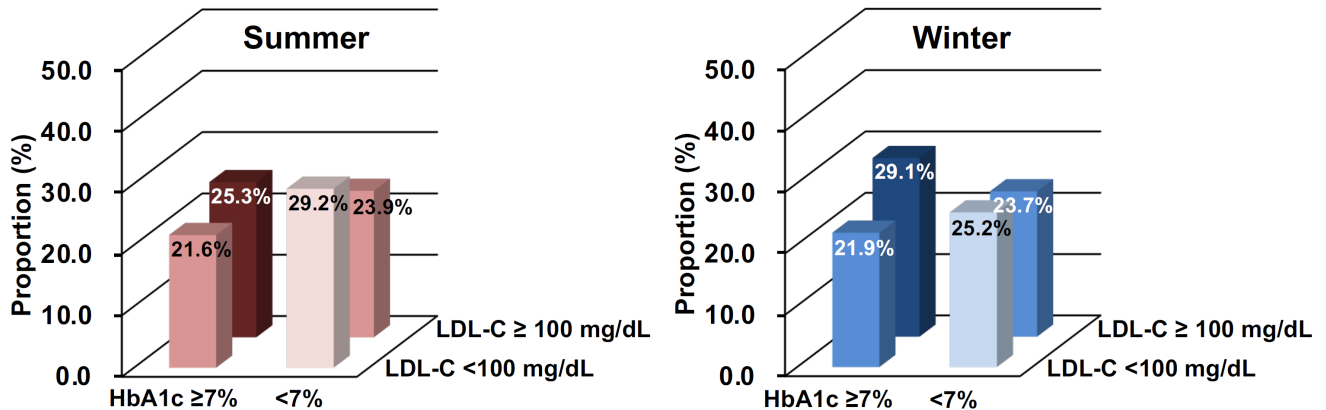

**C. Blood pressure and LDL-cholesterol**

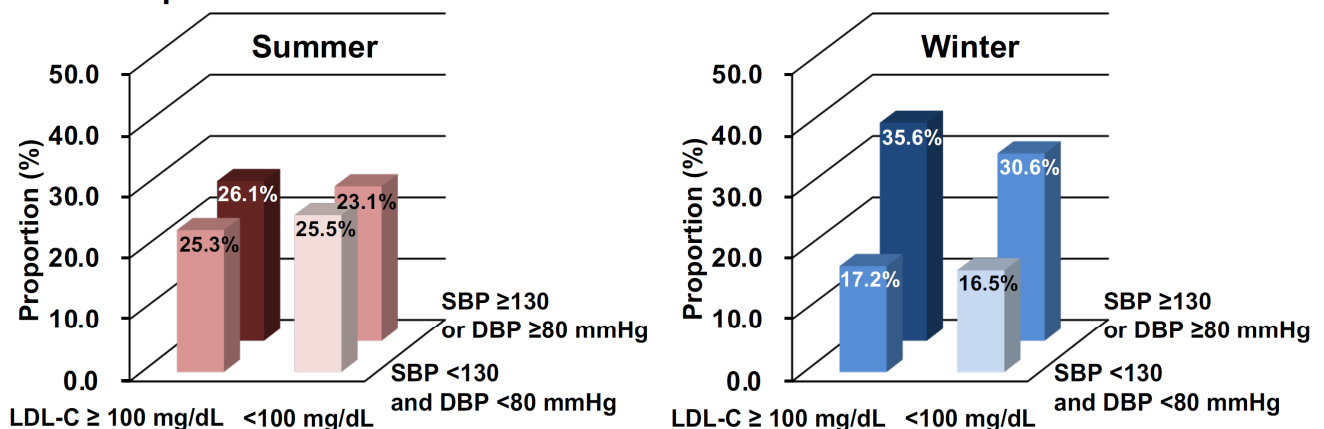

Supplement: dc181953supplementarydata.pdf [file dc181953supplementarydata.pdf]
